# Supplementary material
Source: PubMed Central journal article supplement (PMC9485134)
Supplement: 41386_2022_1401_MOESM1_ESM.pdf [file 41386_2022_1401_MOESM1_ESM.pdf]

## **Supplementary data - Genetic overlap between mood instability and alcohol-related traits suggests shared biological underpinnings**

### Validation with independent GWASs

Both the extent of polygenic overlap and genetic correlation were replicated for MOOD & GSCAN-AC (**Supplementary Figure 8 A&B**) with distinct log-likelihood optimum (**Supplementary Figure 8C**) and positive AIC value when compared to the model with minimum overlap. However, as with MVP-AUD, MiXeR was not deemed reliable for MOOD & PGC-AUD, as indicated by oscillating log-likelihood profile (**Supplementary Figure 8D**) producing large standard deviation of the number of 'causal' variants (SD =1,600 for 900 variants), and negative AIC compared to both minimum and maximum overlap (noticing that there was also a lack of enrichment in the corresponding Q-Q plot, data not shown). Consequently, conjFDR for MOOD and PGC-AUD yielded only one joint significant locus (**Supplementary Figure 9**). Effect directions of lead SNPs identified in discovery conjFDR analyses demonstrated a good agreement between discovery and validation GWASs on alcohol-related phenotypes (**Supplementary Table 1**). For AC, 15 of 18 (83%) loci were concordant ( $p = 0.0037$ ), while for AUD 14 out of 20 (70%) were concordant ( $p = 0.0576$ ). Finally, in order to investigate whether MiXeR MOOD & AUD results were due to power issues or to the genetic architecture of AUD itself, we ran MiXeR between MOOD and a meta-analyzed summary statistics of AUD from PGC + MVP samples (**Supplementary Figure 10**). We showed that, while the statistical power was overall increased (**Supplementary Figure 10A**), MiXeR estimates of phenotype-specific and shared fraction of "causal" variants remained unstable, as indicated by large standard deviation, erratic log-likelihood plot (**Supplementary Figure 10B**). AIC values for both minimum and maximum possible overlap were marginally positive. Finally, joint analyses for alcohol-related phenotypes with GSCAN-AC and either MVP

or PGC AUD samples yielded similar patterns of polygenic overlap, genetic correlation (**Supplementary Figure 11**) and jointly-associated loci (**Supplementary Figure 12**) as our discovery analyses.

### Phenotypic associations between MOOD, AC and AUD

After adjustment on sex, age and ancestry, each linear relationship between MOOD and both alcohol-related phenotypes remained strong and significant (all  $p < 0.001$ ):  $AC \sim MOOD$  ( $\beta = 0.025$ ),  $AUD \sim MOOD$  ( $\beta = 0.31$ ),  $MOOD \sim AC$  ( $\beta = 0.059$ ) and  $MOOD \sim AUD$  ( $\beta = 0.063$ ). In the model where MOOD and AC were entered together as independent variables, AUD was significantly associated with MOOD ( $\beta = 0.32$ ), with AC ( $\beta = 0.03$ ), and with their interaction term ( $\beta = -0.039$ ); all  $p < 0.001$ . Of note, comparing standardized coefficients obtained from regression on binary (MOOD, AUD) vs. continuous variables (AC) should be done with caution.

### Exploratory analyses

BINGE GWAS in the UK Biobank was not powerful enough to get reliable Bivariate Mixer estimates (data not shown). However, conjFDR yielded 12 (BINGE & MOOD) and 10 (BINGE & AUD) significant jointly associated loci. Interestingly, only one lead SNP, rs4245150, was common to both analyses, and no SNP was shared between these analyses and conjFDR with MOOD and AC. **Supplementary Figure 13** shows MiXeR findings for all exploratory analyses. As regards the joint polygenicity of MOOD and AC quantity (ALCINTAKErnt, **Supplementary Figure 13A**) vs. MOOD and AC frequency (DRINKALCw, **Supplementary Figure 13B**), we obtained similar results as for the total AUDIT-C, that is, complete polygenic overlap. However, conversely to the literature, both genetic correlations with MOOD were negative. The polygenic overlap of AC frequency and AUD was ~50% shared, while it was >90% shared for AC quantity; with both showing positive genetic correlation (again, stronger for quantity vs. frequency, 0.65 vs. 0.37; **Supplementary Figure 13C & D**). There was no difference in the

shared vs. unique polygenicity of MOOD and AC as a function of lifetime smoking status (**Supplementary Figure 14A & B**). Of note, MOOD and AUD MiXeR analyses showed different patterns: similar to that of the whole UK Biobank sample for ever-smokers, but showing complete overlap for never-smokers (**Supplementary Figure 14C & D**). However, AIC for the latter analysis was negative, indicating a lack of statistical power and, thus, barely interpretable results. Finally, it is noteworthy that the genetic correlation between MOOD GWASs conducted in never vs. ever smoked was =1.”

## Supplementary Tables and Figures

**Supplementary Figure 1:** overview of analyses and annotations

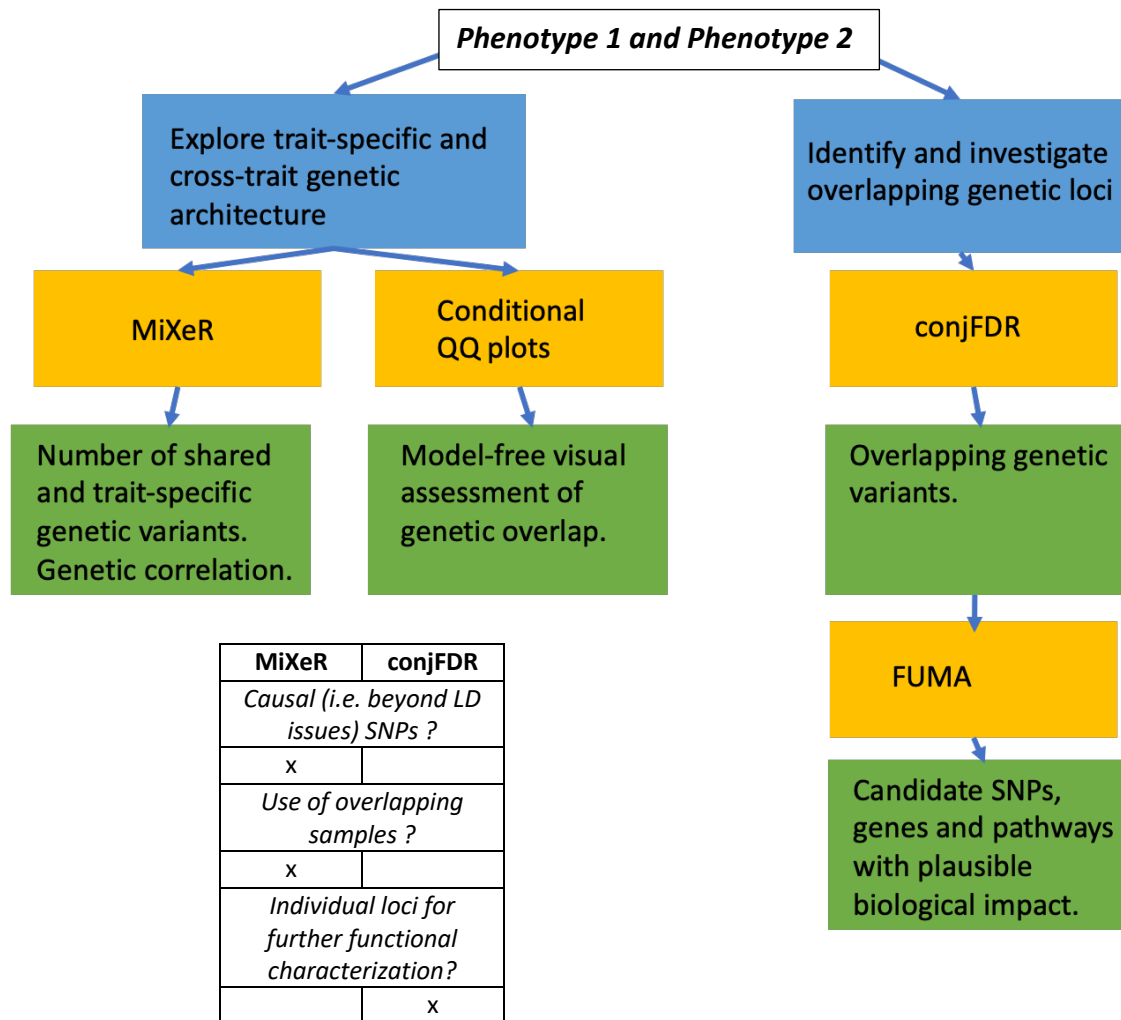

FDR, false discovery rate; GWAS, genome-wide association study; FUMA, Functional Mapping and Annotation; SNP, single nucleotide polymorphism. Blue, scientific question; yellow, Analysis method/tool; green, output. The embedded table summarizes the comparative advantages of MiXeR vs. conjFDR.

**Supplementary Figure 2: log-likelihood plots from the discovery MiXeR analysis.** The number of causal variants is expressed in thousands.

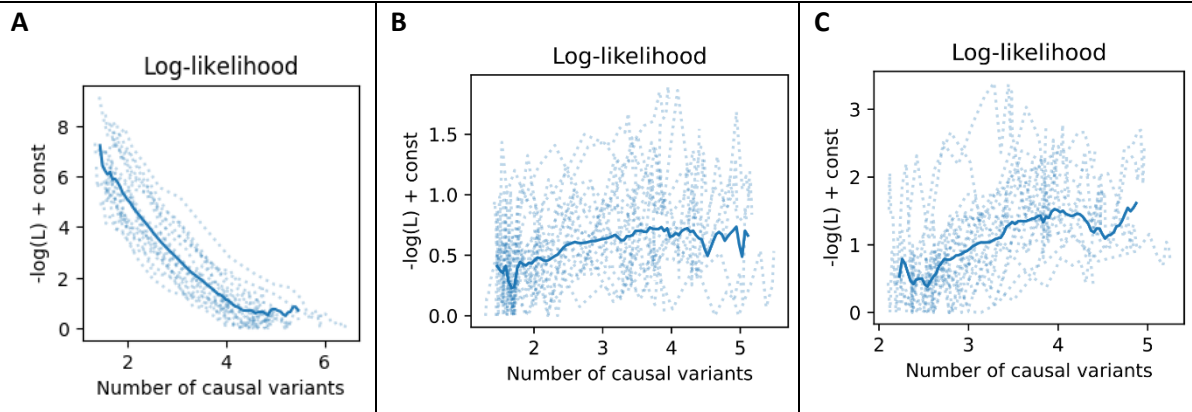

MOOD, mood instability in the UK biobank; AC, alcohol consumption in the MVP sample; AUD, alcohol use disorder in the MVP sample.

**Supplementary Figure 3: Q-Q plots from MiXeR analyses showing enrichment for significant SNPs from trait one as the significance in the second trait increases.**

**A) AC|MOOD, MOOD|AC**

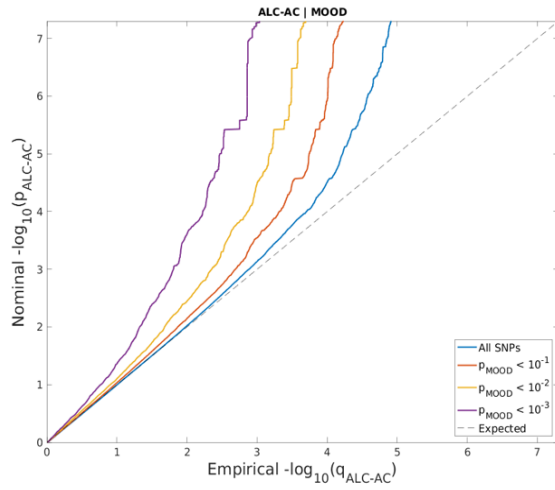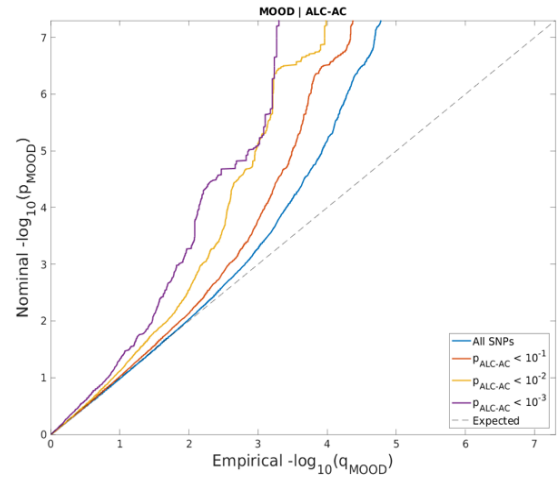

**B) AUD|MOOD, MOOD|AUD**

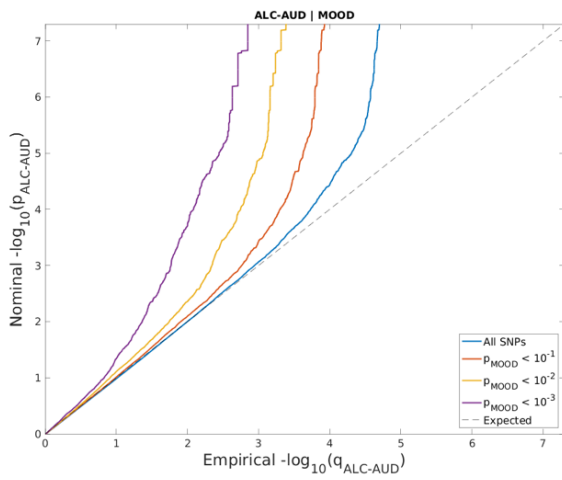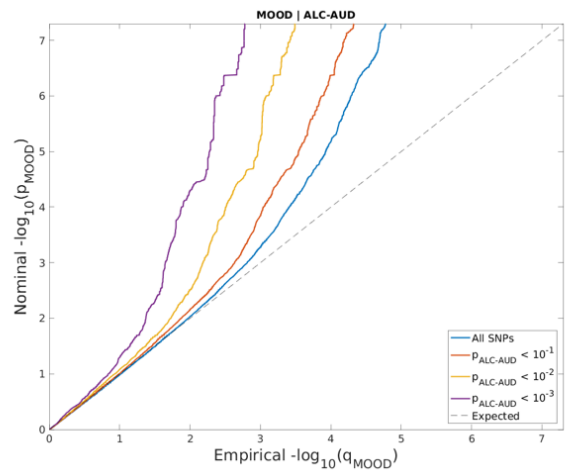

MOOD, mood instability in the UK biobank; AC, alcohol consumption in the MVP sample; AUD, alcohol use disorder in the MPV sample.

**Supplementary Figure 4:** significantly enriched canonical pathways for (A) mood instability (MOOD) & alcohol consumption (AC) and (B) MOOD & alcohol use disorder (AUD). Gene sets were obtained by Functional Mapping and Annotation (FUMA) procedure based on the genes mapped from the discovery conjFDR analysis.

**A)**

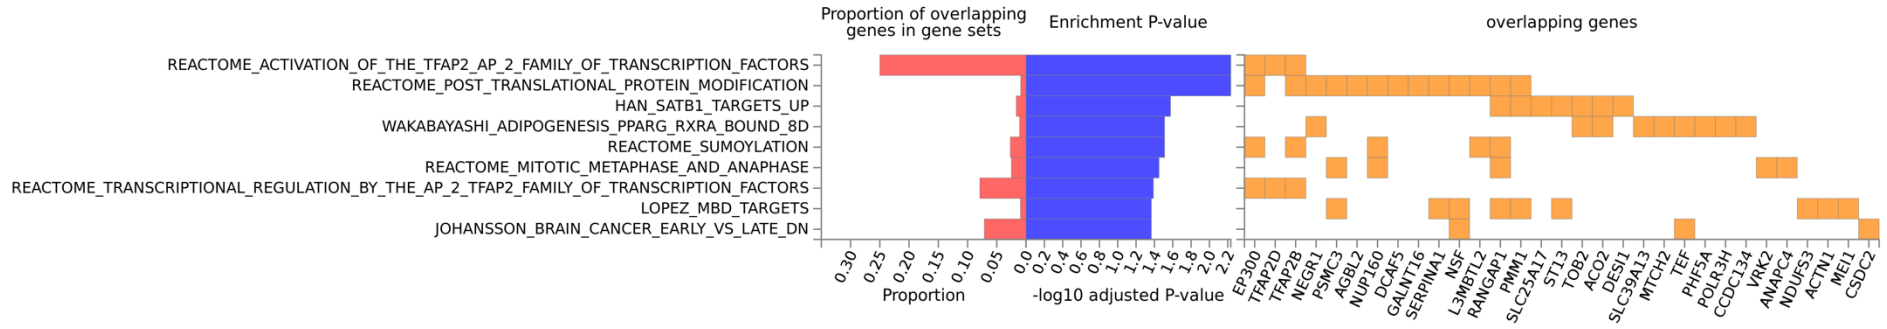

**B)**

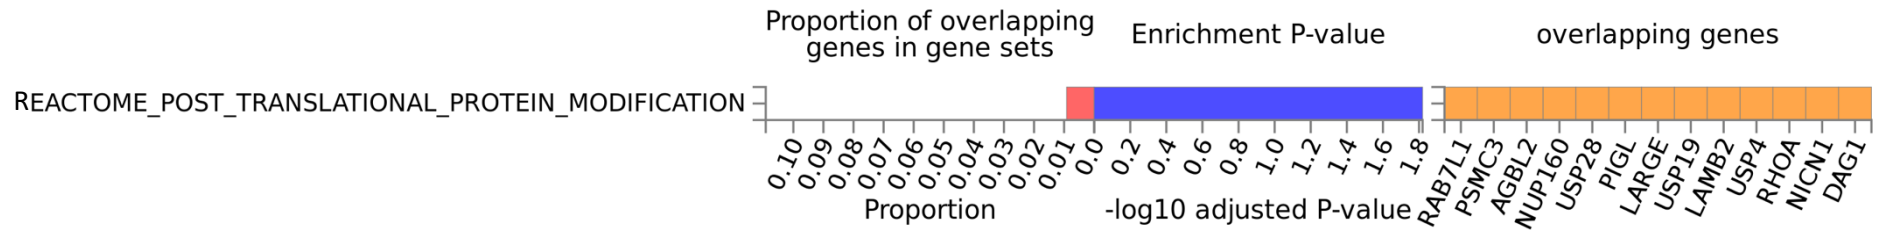

**Supplementary Figure 5: increasing  $p$ -values for tissue-specific differential gene expression (both sides) for genes mapped after conjFDR for (A) mood instability and MVP-alcohol consumption and (B) mood instability and MVP-alcohol use disorder. Gene expression is obtained from GTEx V.8 (<https://gtexportal.org/home/>). Image was cropped, leaving some unwanted marks on panel B.**

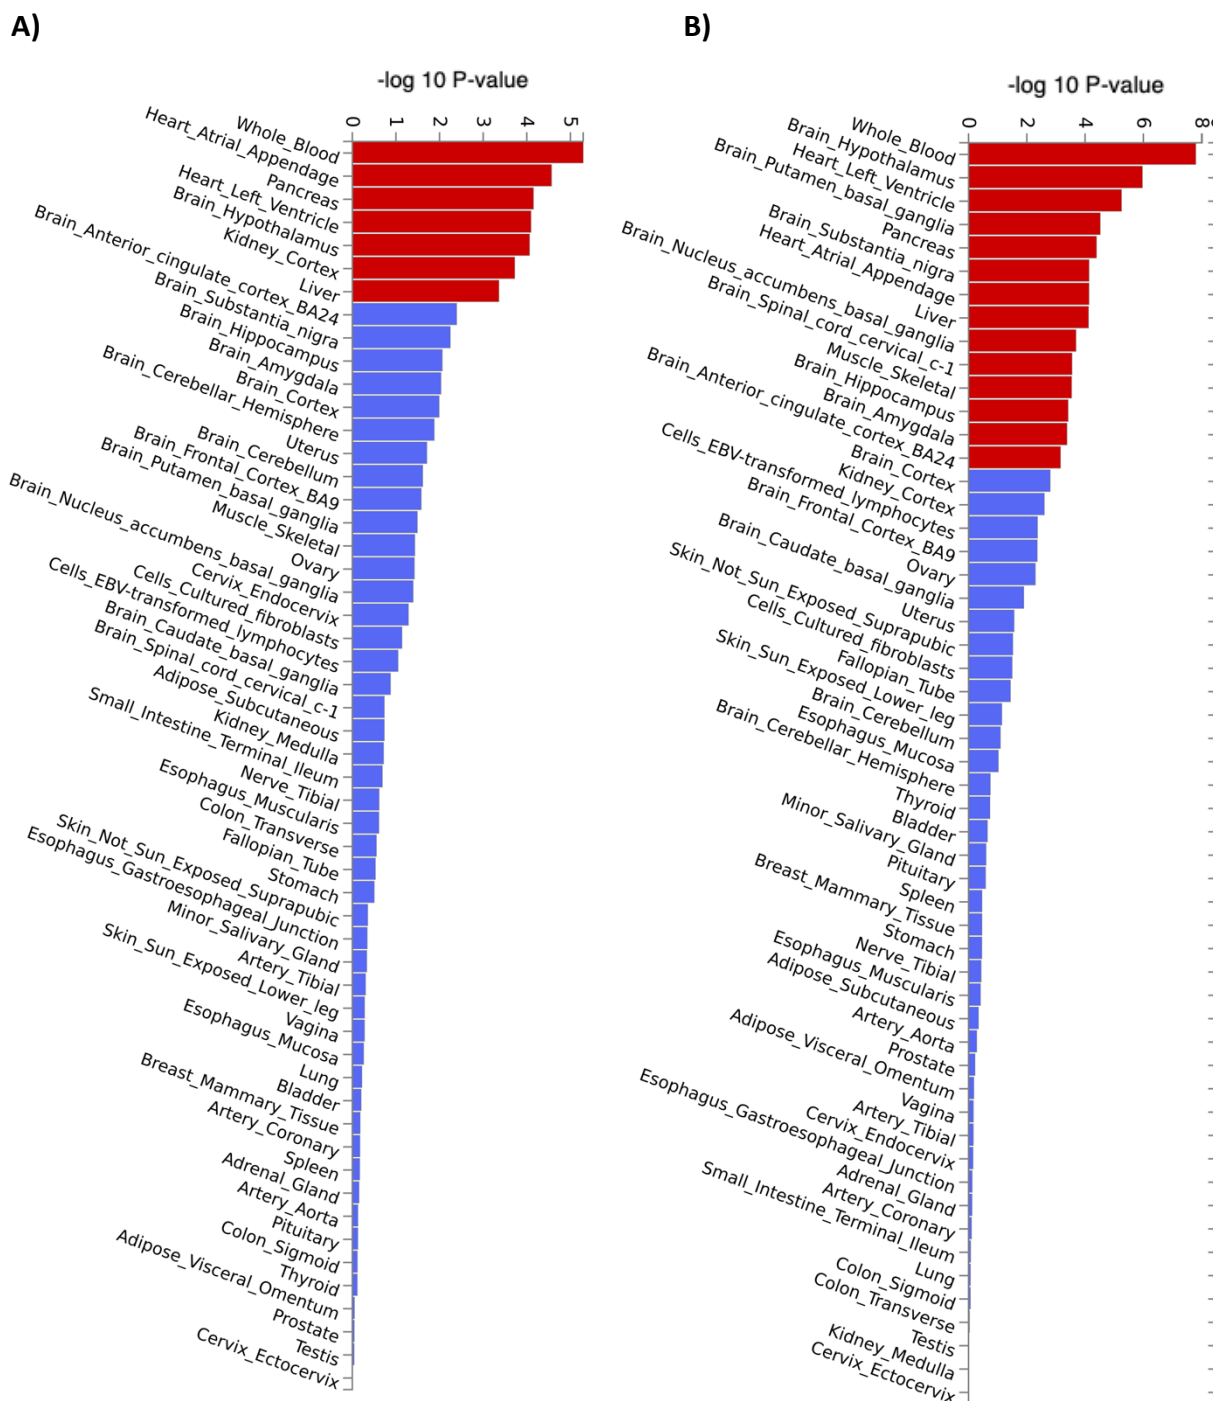



**Supplementary Figure 6: expression heatmaps** for genes mapped after conjFDR for (A) mood instability and MVP-alcohol consumption and (B) mood instability and MVP-alcohol use disorder. Gene expression is obtained from BrainSpan data (<https://www.brainspan.org/>) at various developmental stages during fetal life, infancy, adolescence and adulthood.

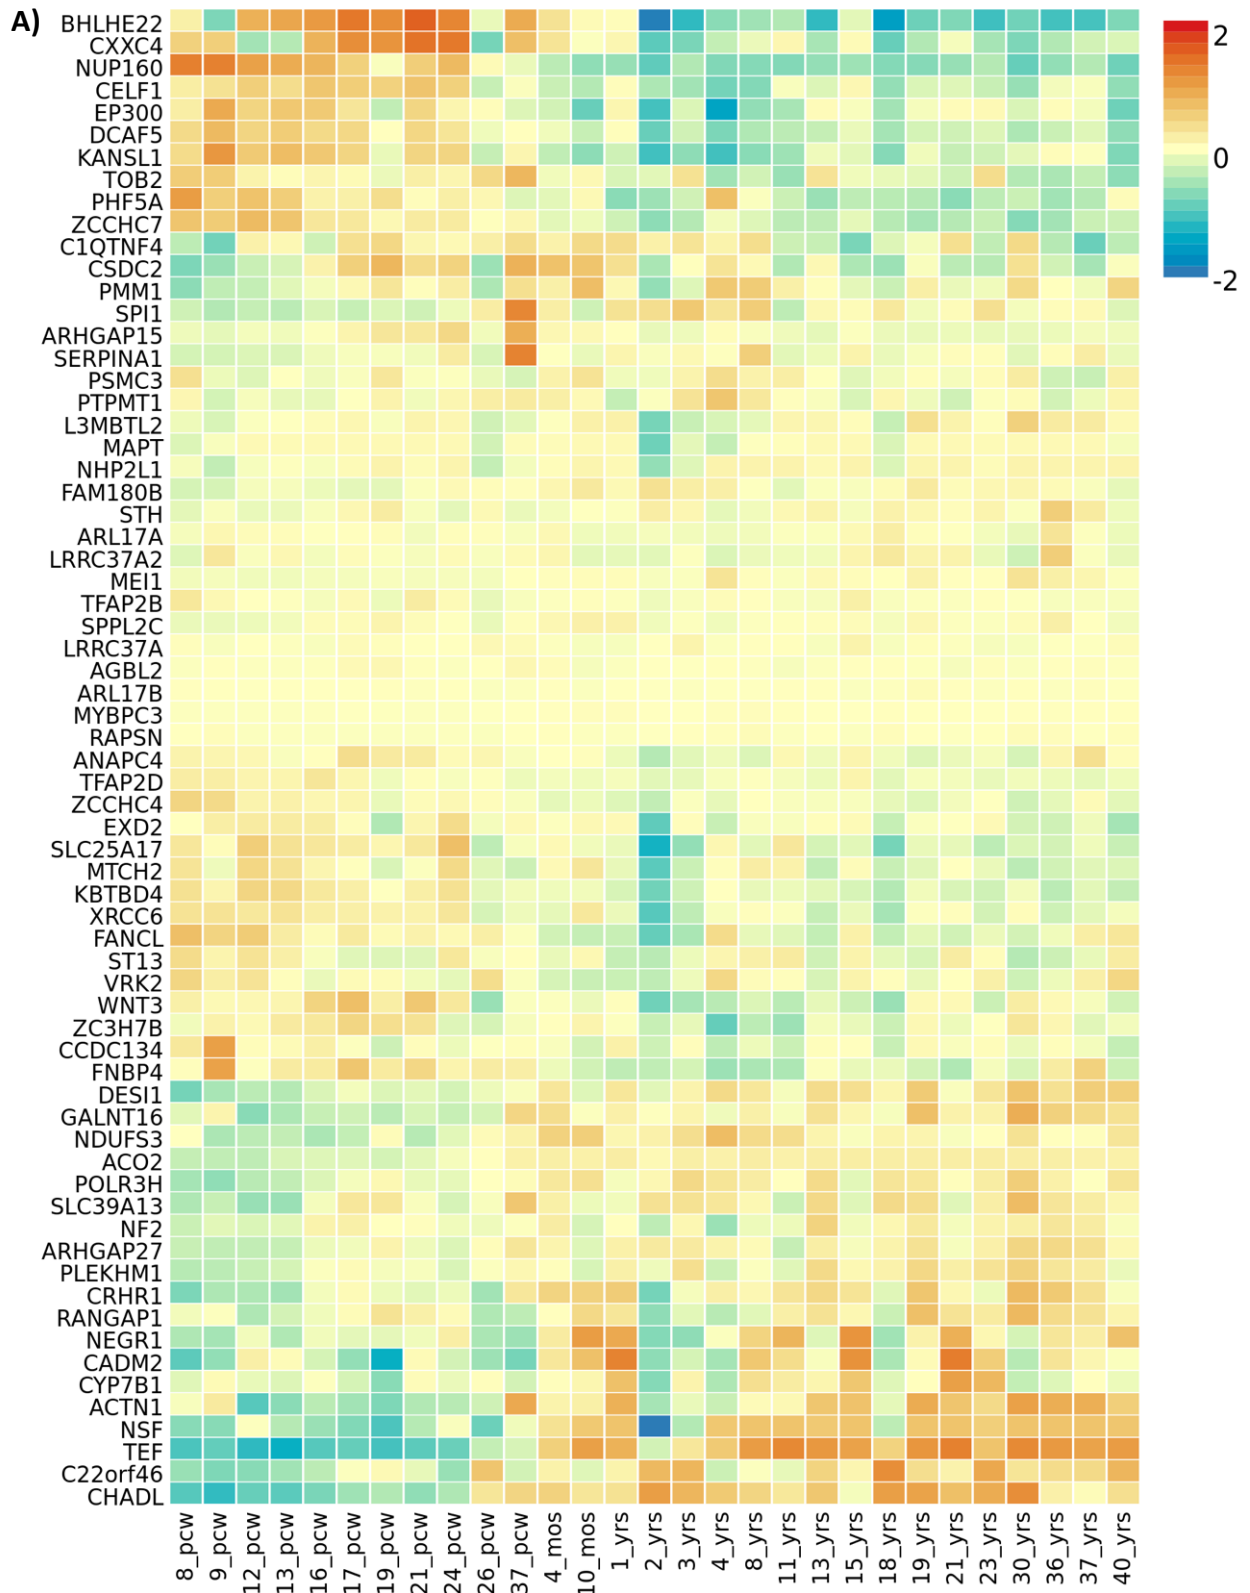

B)

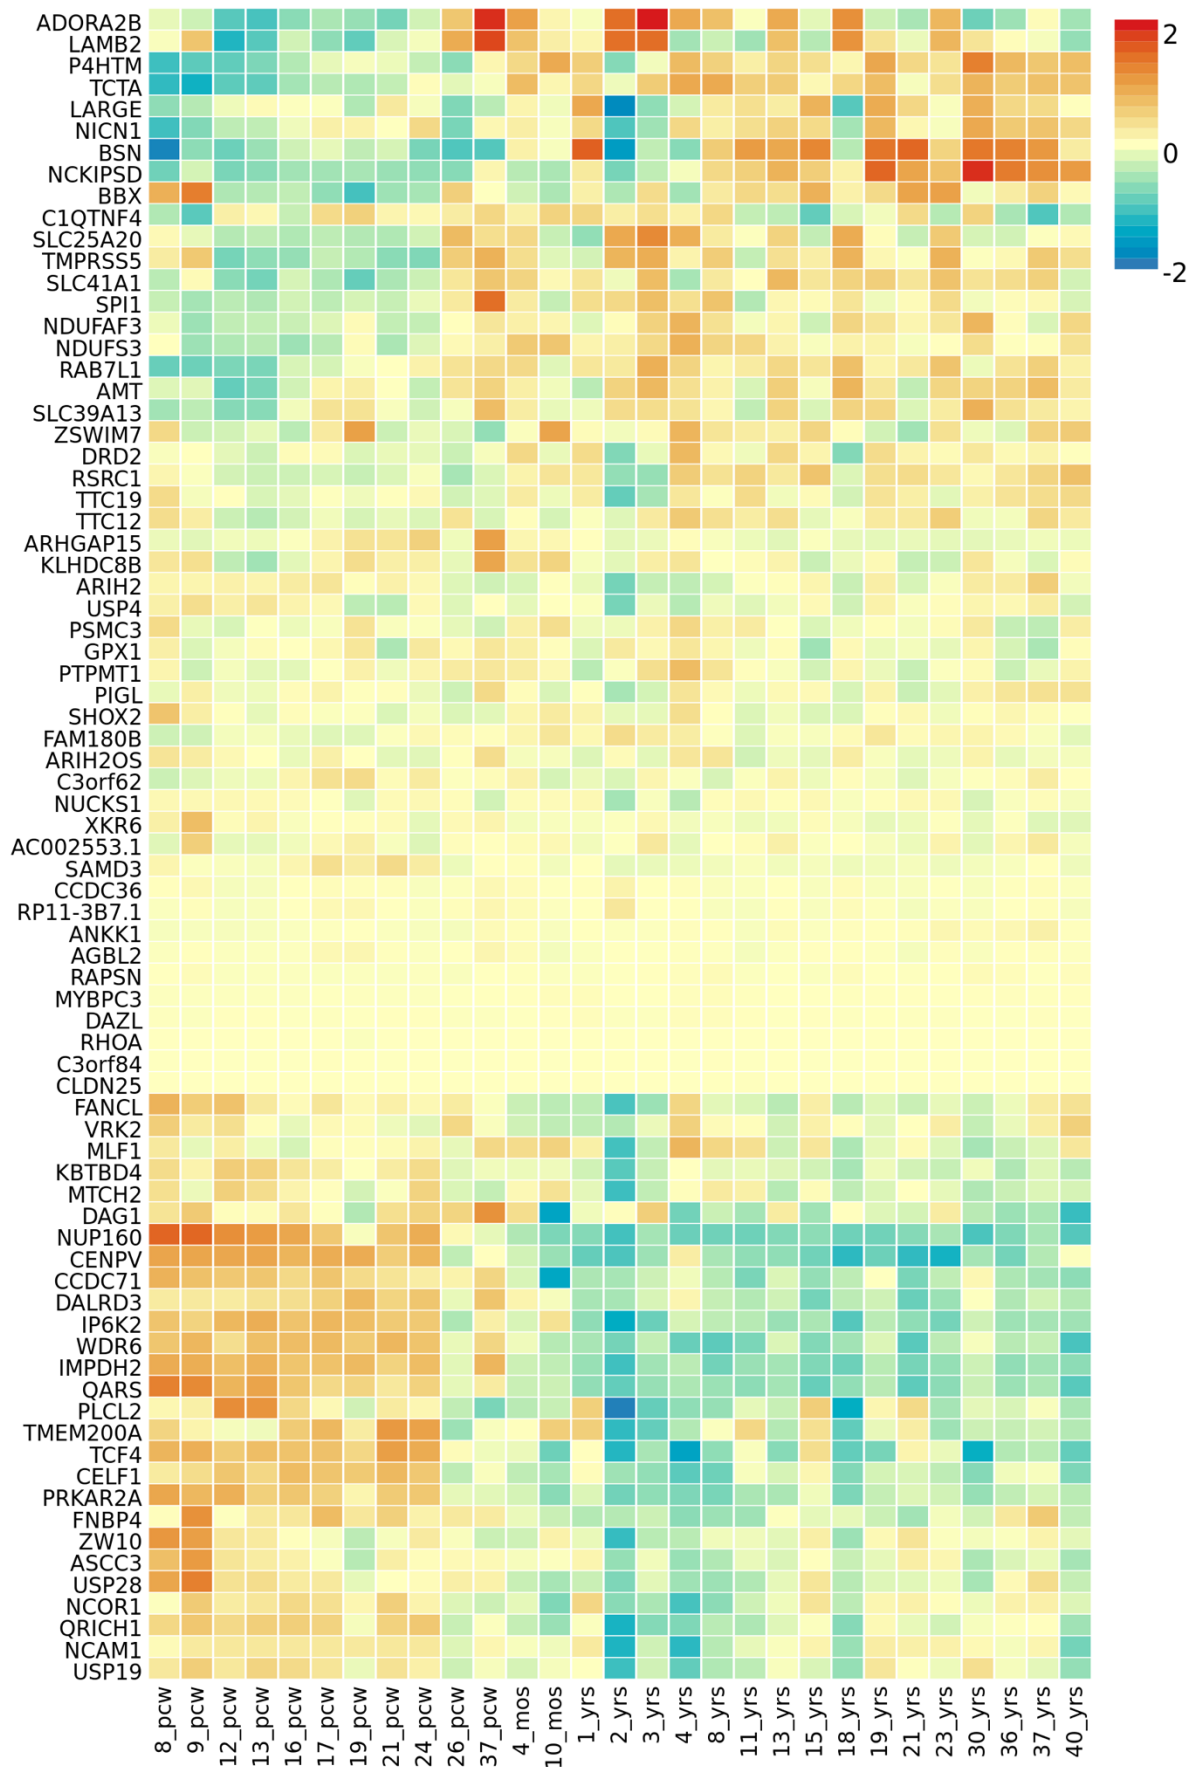

**Supplementary Figure 7 : graphical representation of the PheWAS for15 novel SNPs for MOOD & AC (left) and MOOD & AUD (right). Plot obtained using the MRC IEU PheWAS tool. Red upwards arrows indicate positive effect size, blue downward arrows indicate negative effect size.**

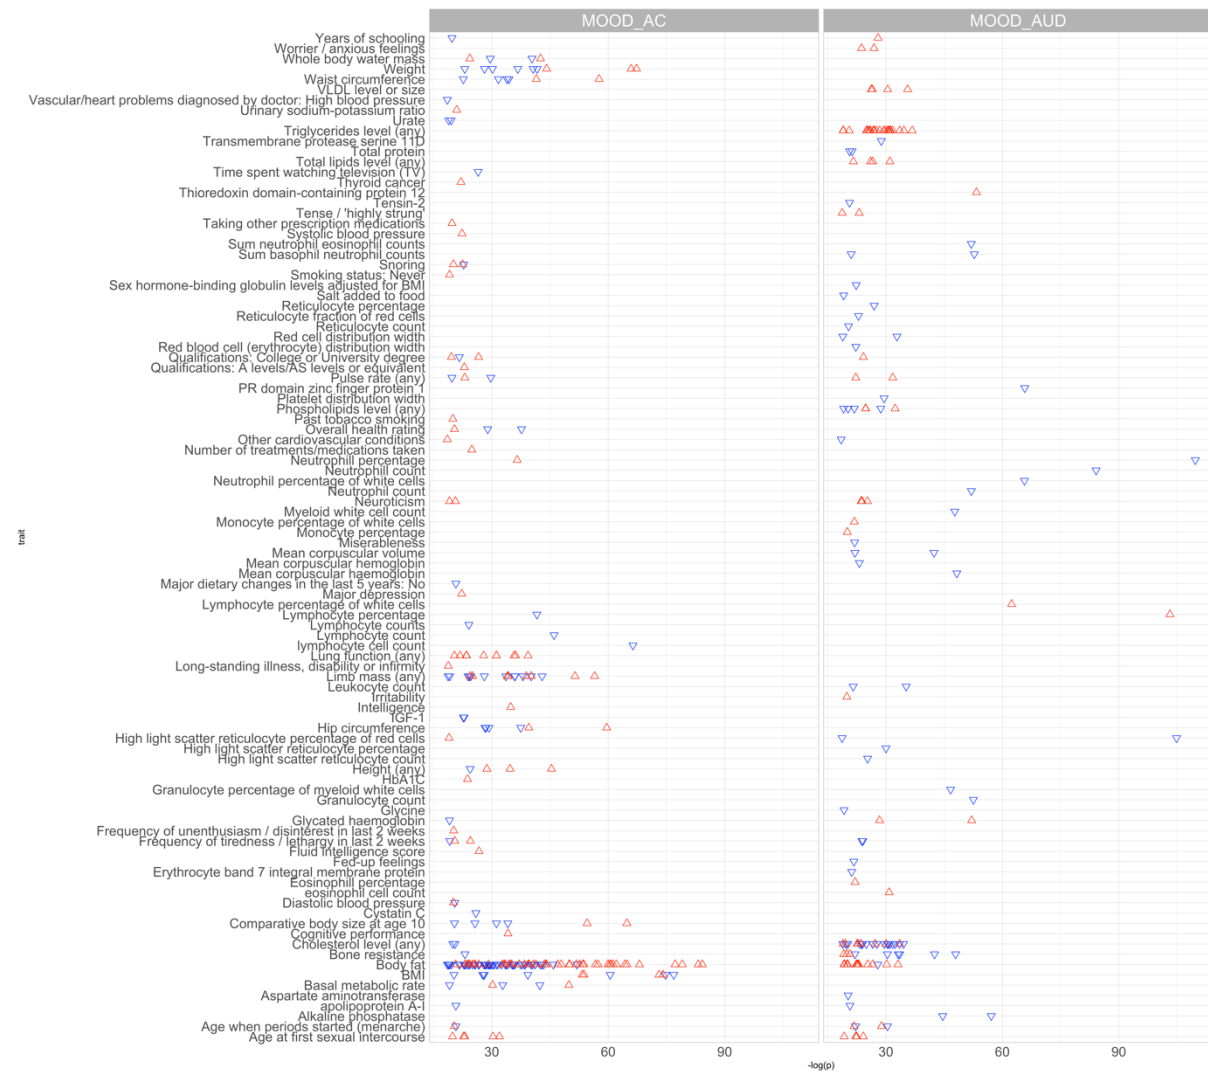

**Supplementary Figure 8: validation for mood instability and alcohol-related phenotypes.** Venn diagrams and Q-Q plots from MiXeR replication analyses showing polygenic overlap and enrichment for significant SNPs at decreasing thresholds. Analyses were performed using GWAS from UK biobank for mood instability (MOOD), GSCAN for alcohol consumption ( $AC_{rep}$ ) and PGC for alcohol use disorder ( $AUD_{rep}$ ).  $r_g$ , genetic correlation.

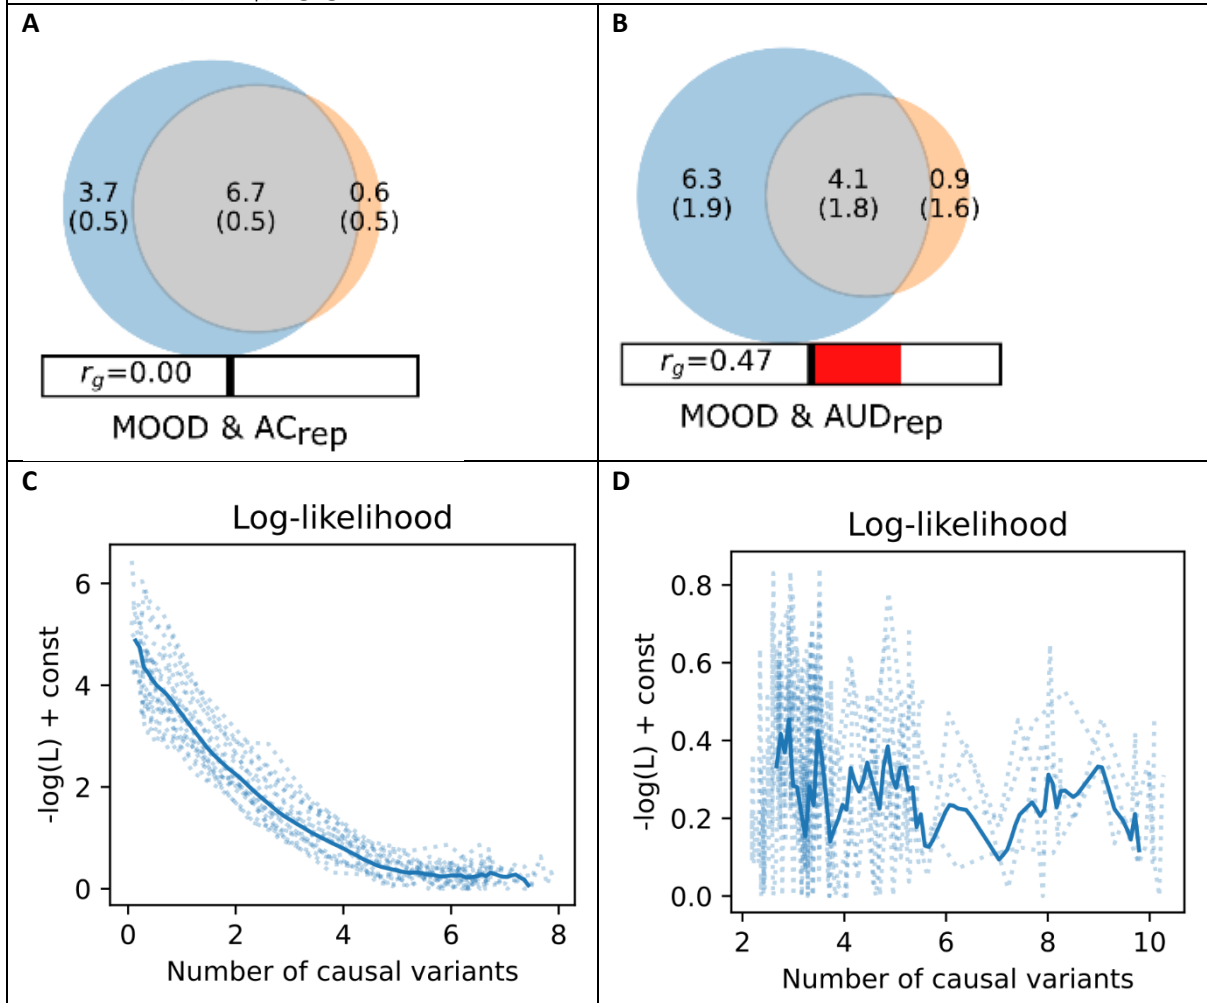

**Supplementary Figure 9: conjFDR validation for mood instability and alcohol-related phenotypes.** Manhattan plots for conjFDR between mood instability and GSCAN-alcohol consumption (MOOD & AC, in blue) and between mood instability and PGC-alcohol use disorder (MOOD & AUD, in brown).

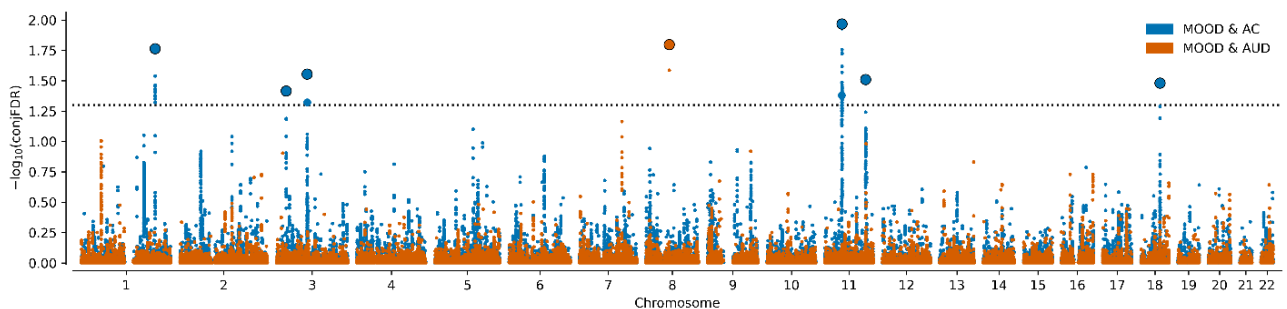

**Supplementary Figure 10: Validation analyses for mood instability and alcohol use disorder using meta-analysis between the MVP and the PGC samples.** (A) Q-Q plots from MVP alone vs. MVP+PGC AUD summary statistics. (B) Venn diagrams and Q-Q plots from MiXeR replication analyses showing polygenic overlap and enrichment for significant SNPs at decreasing thresholds. Analyses were performed using GWAS from UK biobank for mood instability (MOOD).  $r_g$ , genetic correlation.

(A)

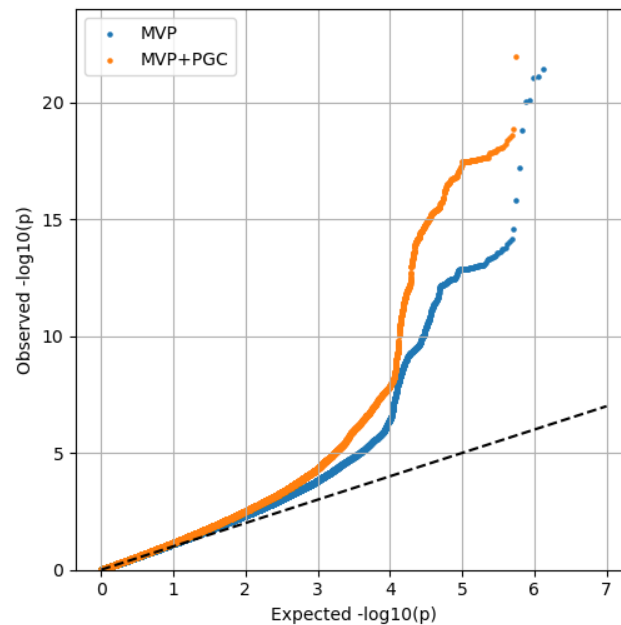

(B)

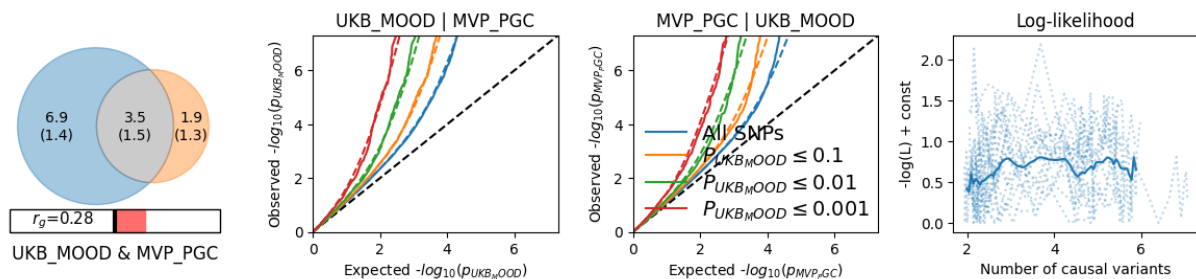

MOOD, mood instability in the UK biobank; MVP\_PGC, meta-analysis of the alcohol use disorder in the Million Veteran Program + the Psychiatric Genomics Consortium samples.

**Supplementary Figure 11: Validation for alcohol-related phenotypes.** Venn diagrams and log-likelihood plots from MiXeR quasi-replication showing polygenic overlap and enrichment for significant SNPs at decreasing thresholds.  $r_g$ , genetic correlation.

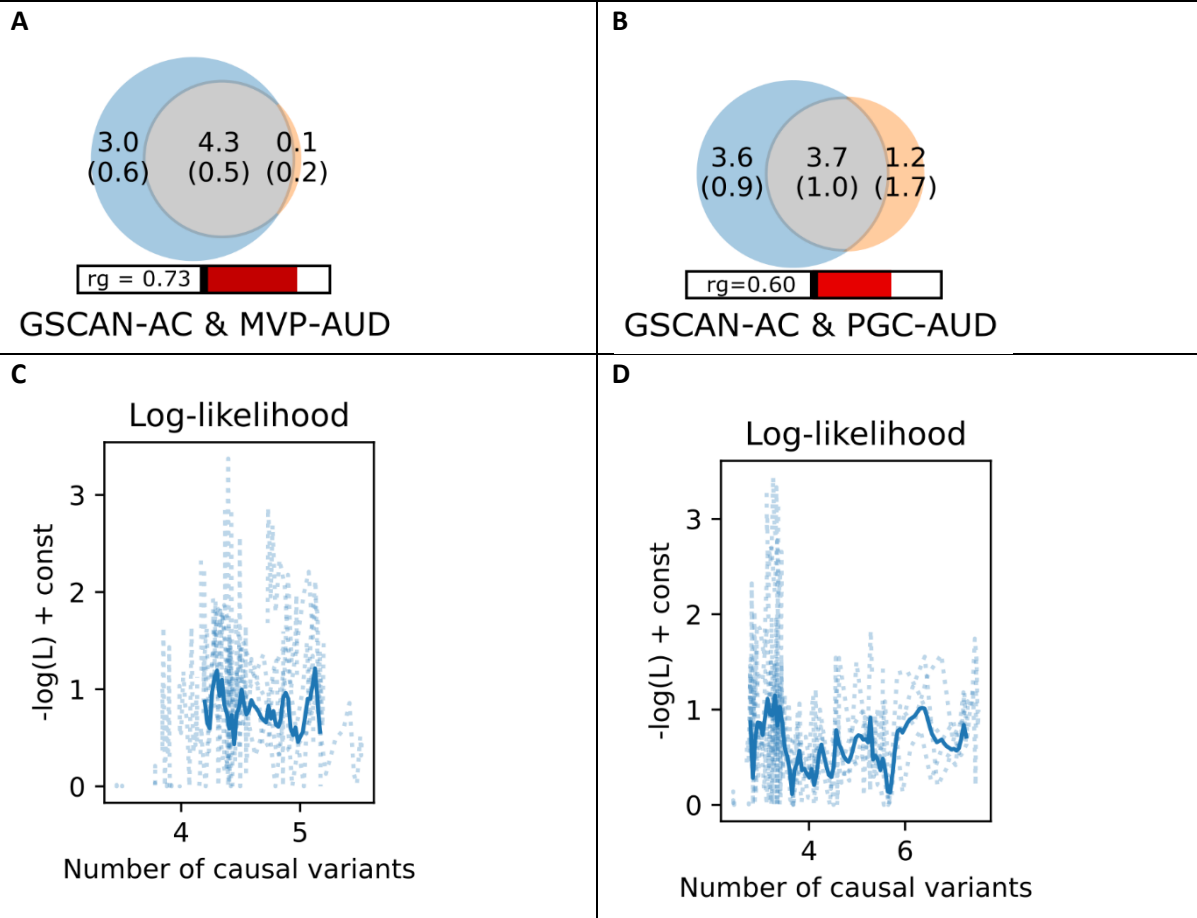

MVP, Million Veteran Program; GSCAN, GWAS & Sequencing Consortium of Alcohol and Nicotine use; PGC, Psychiatric Genetics Consortium; AC, alcohol consumption; AUD, alcohol use disorder.

**Supplementary Figure 12:** Manhattan plots for conjFDR between GSCAN-alcohol consumption and MVP-alcohol use disorder (GSCAN-AC & MVP-AUD, in green) and between MVP-alcohol consumption and PGC-alcohol use disorder (MVP-AC & PGC-AUD, in yellow).

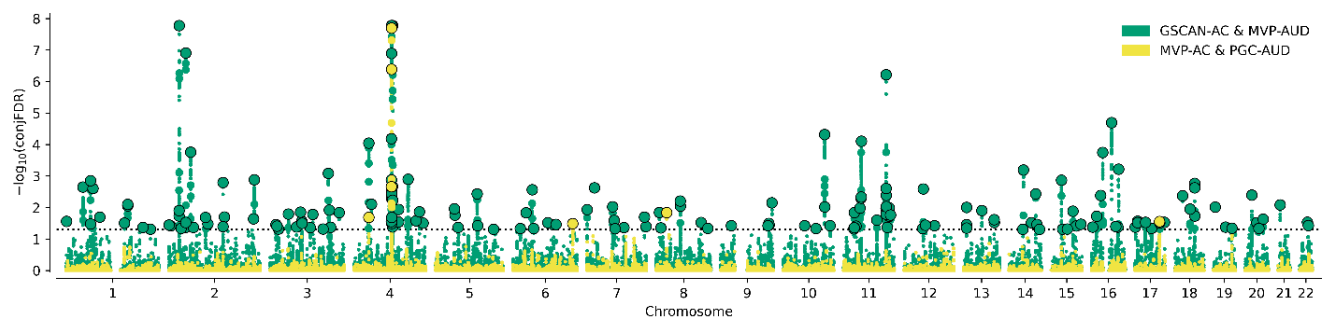

MVP, Million Veteran Program; GSCAN, GWAS & Sequencing Consortium of Alcohol and Nicotine use; PGC, Psychiatric Genetics Consortium. AC, alcohol consumption; AUD, alcohol use disorder.

**Supplementary Figure 13: Exploratory analyses.** Venn diagrams, Q-Q plots and log-likelihood plots from MiXeR showing polygenic overlap and enrichment for significant SNPs at decreasing thresholds between mood instability (MOOD) and AC phenotypes.  $r_g$ , genetic correlation.

**A) MOOD and alcohol quantity.**

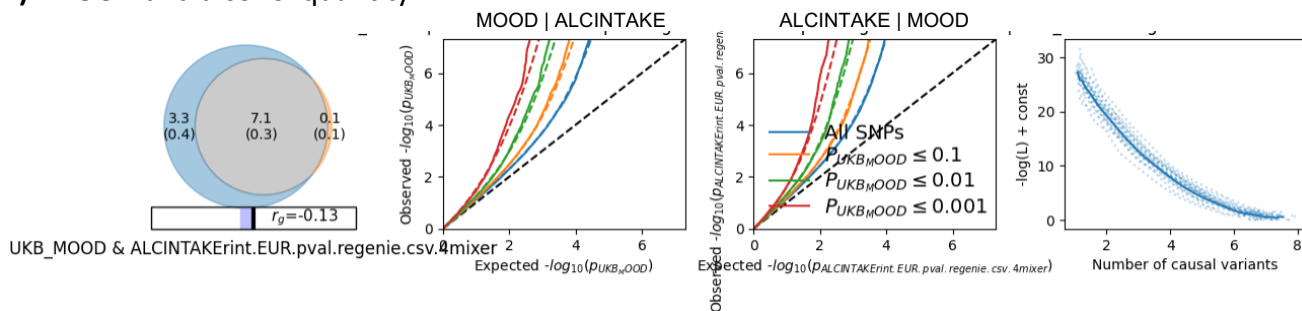

**B) MOOD and alcohol frequency**

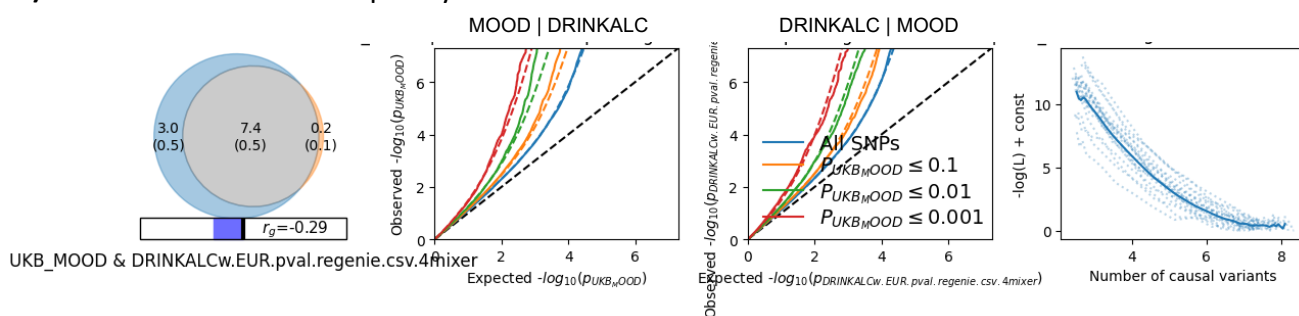

**C) AUD and alcohol quantity**

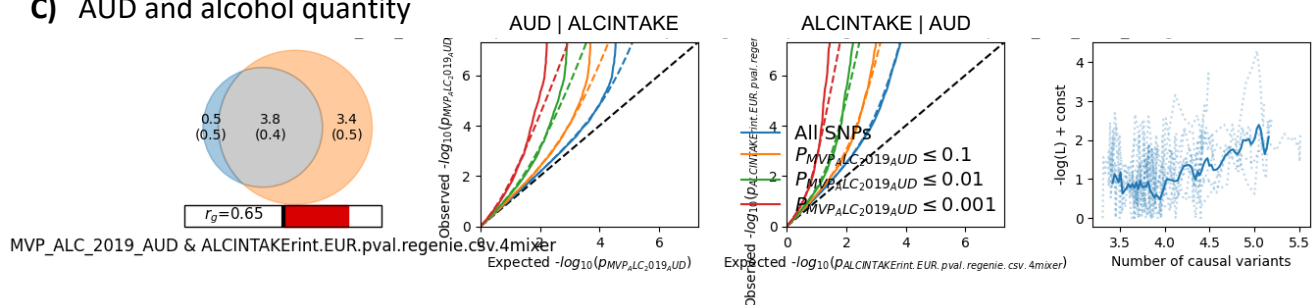

**D) AUD and alcohol frequency**

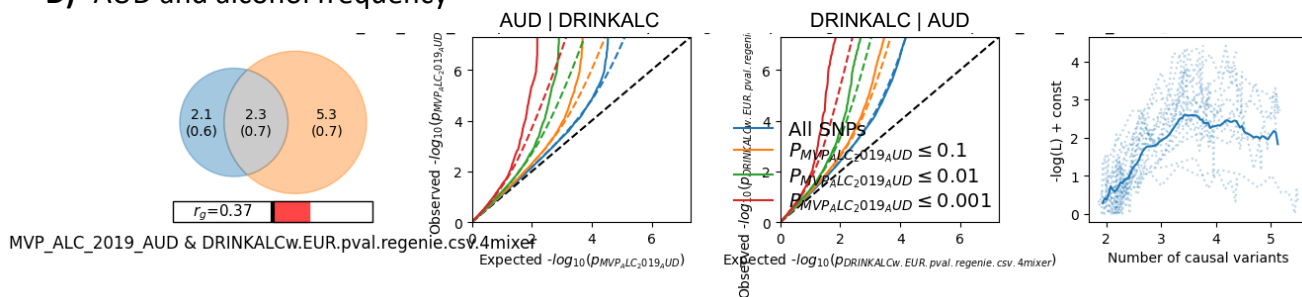



**Supplementary Figure 14: Exploratory analyses.** Venn diagrams, Q-Q plots and log-likelihood plots from MiXeR showing polygenic overlap and enrichment for significant SNPs at decreasing thresholds between mood instability (MOOD) and AC or AUD phenotypes as a function of lifetime tobacco smoking status.  $r_g$ , genetic correlation.

**A) MOOD and AC in never-smokers**

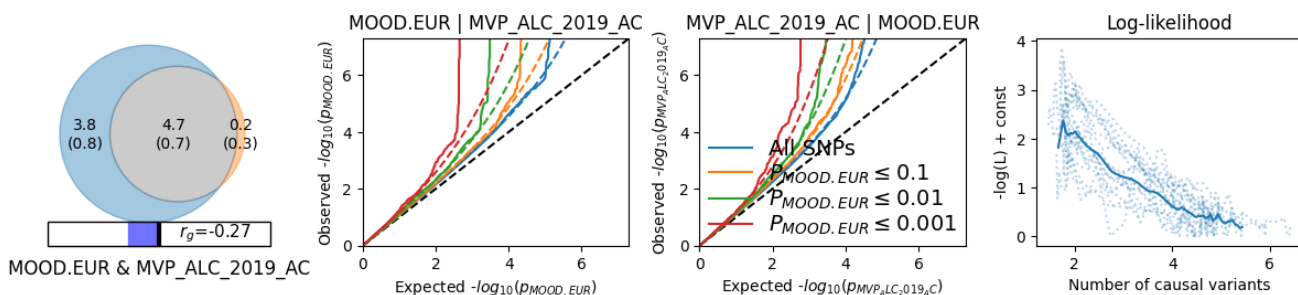

**B) MOOD and AC in ever-smokers**

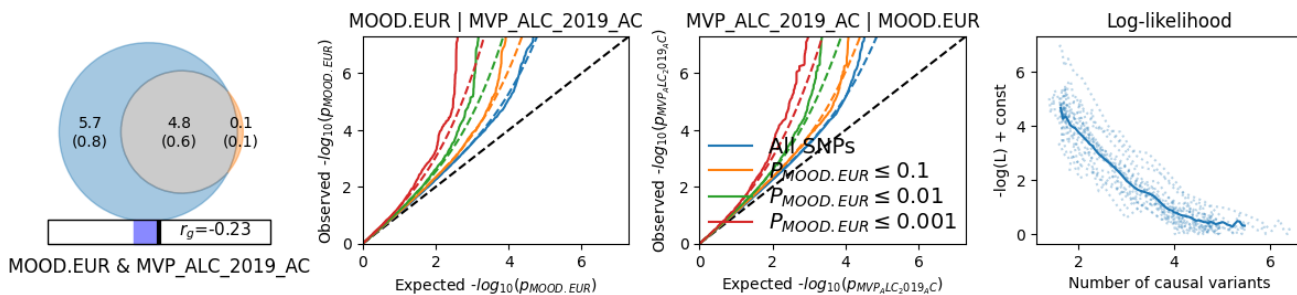

**C) MOOD and AUD in never-smokers**

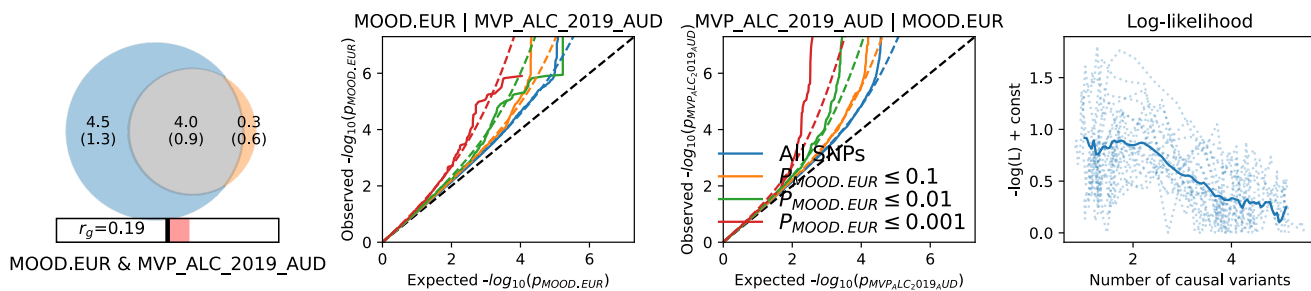

**D) MOOD and AUD in ever-smokers**

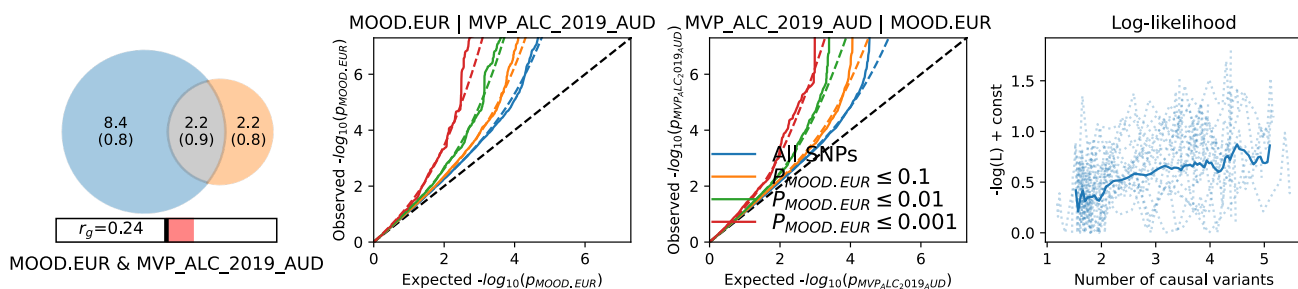

**Supplementary Table 1:** significant lead SNPs from conjunctive false discovery rate (conjFDR) analysis and their functional annotation for (A) mood instability and alcohol consumption and (B) mood instability and alcohol use disorder. *P*-values and Z scores are rounded for five digits. Novel SNPs for GWASs about MOOD, AC and AUD published as of June 1 2022 are written in bold. See supplementary File Supp\_Table1.xlsx.

**A) MOOD and AC**

**B) MOOD and AUD**

**Supplementary Table 2:** overview of polygenic overlap and genetic correlation obtained by MiXeR in each discovery and validation analysis. Note that the degree of polygenic overlap is based on 90% of the joint genetic signal for the two phenotypes considered.

| Phenotype 1               | Phenotype 2 | Sample 1            | Sample 2 | % shared polygenic overlap for phenotype 1 | % shared polygenic overlap for phenotype 2 | Genetic correlation ( $r_g$ ) |
|---------------------------|-------------|---------------------|----------|--------------------------------------------|--------------------------------------------|-------------------------------|
| <i>Discovery analyses</i> |             |                     |          |                                            |                                            |                               |
| MOOD                      | AC          |                     |          | 47                                         | 98                                         | -0.22                         |
|                           | AUD         | UKB                 | MVP      | 20                                         | 49                                         | 0.23                          |
| AC                        | AUD         |                     |          | 51                                         | 58                                         | 0.52                          |
| <i>Validation</i>         |             |                     |          |                                            |                                            |                               |
| MOOD                      | AC          | UKB                 | GSCAN    | 74                                         | 92                                         | 0                             |
|                           | AUD         | UKB                 |          | 39                                         | 82                                         | 0.47                          |
| AC                        | AUD         | GSCAN               |          | 59                                         | 98                                         | 0.73                          |
|                           |             | MVP                 | MVP      | 51                                         | 58                                         | 0.52                          |
|                           |             | GSCAN               | PGC      | 51                                         | 76                                         | 0.6                           |
|                           |             | GSCAN (without UKB) | PGC      | 45                                         | 61                                         | 0.52                          |

MOOD, mood instability; AC, alcohol consumption; AUD, alcohol use disorder; UKB, UK Biobank; MVP, Million Veteran Program; GSCAN, GWAS & Sequencing Consortium of Alcohol and Nicotine use; PGC, Psychiatric Genetics Consortium; MDD, major depressive disorder; MVP\_PGC, meta-analysis of the alcohol use disorder in the Million Veteran Program + the Psychiatric Genomics Consortium samples.

**Supplementary Table 3:** Lead SNPs with validation conjFDR  $p < 0.05$  for alcohol-related phenotypes.

| SNP                          | CHR | BP        | A1 | A2 | conjFDR discovery | Z or BETA discovery | conjFDR validation | Z or BETA validation |
|------------------------------|-----|-----------|----|----|-------------------|---------------------|--------------------|----------------------|
| <i>MVP-AC &amp; GSCAN-AC</i> |     |           |    |    |                   |                     |                    |                      |
| rs2312147                    | 2   | 58222928  | C  | T  | 7.27E-09          | 0.03166             | 0.00414            | 0.00883              |
| rs13411140*                  | 2   | 144215811 | C  | T  | 0.0002872         | 0.02014             | 0.00435            | 0.00885              |
| rs818219                     | 3   | 85374589  | C  | T  | 0.0002052         | 0.01989             | 0.000324           | 0.0108               |
| rs112635299                  | 14  | 94838142  | G  | T  | 8.06E-07          | 0.1043              | 0.000492           | 0.0405               |
| rs11039255*                  | 11  | 47495746  | G  | T  | 5.18E-05          | 0.02297             | 0.00102            | 0.0103               |
| <i>MVP-AUD &amp; PGC-AUD</i> |     |           |    |    |                   |                     |                    |                      |
| rs4273169                    | 2   | 144231309 | A  | G  | 2.63E-05          | -4.204              | 0.00957            | -2.591               |
| rs1940701                    | 11  | 112869404 | C  | T  | 0.0001677         | 3.763               | 0.03791            | 2.076                |
| rs7933981                    | 11  | 113438068 | A  | G  | 3.3E-10           | -6.284              | 0.007097           | -2.692               |
| rs2958171                    | 18  | 53072832  | C  | T  | 2.85E-05          | 4.185               | 0.03127            | -2.154               |

SNP, single nucleotide polymorphism; CHR, chromosome; BP, position in base pairs; A1, alternate allele; A2, reference allele; MVP, Million Veteran Program; GSCAN, GWAS & Sequencing Consortium of Alcohol and Nicotine use; AC, alcohol consumption; AUD, alcohol use disorder; PGC, Psychiatric Genetics Consortium.

**Supplementary Tables 4&5: PheWAS results for conjFDR with MOOD & AC and MOOD & AUD, respectively,** using MRC IEU PheWAS tool. See Supplementary Files SupTab4\_phewasAC.xlsx & SupTab5\_phewasAUD.xlsx.
